# Supplementary material for: Synthesis and evaluation of 2-(2-fluoro-4-hydroxymethyl-5-methoxy-phenoxy)acetic acid as a linker in solid-phase synthesis monitored by gel-phase19F NMR spectroscopy
Source: Royal Society of Chemistry journal article supplement (doi:10.1039/b704472k), 2007-01-01
Supplement: b704472k.pdf [file b704472k.pdf]

Supporting information for

**Synthesis and evaluation of 2-(2-fluoro-4-hydroxymethyl-5-methoxy-phenoxy) acetic acid as linker in solid-phase synthesis monitored by  $^{19}\text{F}$  gel-phase NMR spectroscopy**

Fredrik K. Wallner,<sup>a</sup> Sara Spjut,<sup>a</sup> Dan Boström<sup>b</sup> and Mikael Elofsson<sup>\*a</sup>

<sup>a</sup> Department of Chemistry, Umeå University, SE-90187 Umeå, Sweden.

<sup>b</sup> Energy Technology and Thermal Process Chemistry, Department of Applied Physics and Electronics, Umeå University, Umeå, Sweden.

\* Corresponding author: Mikael Elofsson, Fax: +4690 13 88 85;  
Tel: +4690 786 93 28; E-mail: mikael.elifsson@chem.umu.se

**Contents**

|                                                                                                                 |     |
|-----------------------------------------------------------------------------------------------------------------|-----|
| X-ray crystallography                                                                                           |     |
| General                                                                                                         | p 2 |
| Crystallisation of <b>11</b> and <b>13</b>                                                                      | p 2 |
| Figure 1, structure of <b>11</b>                                                                                | p 2 |
| Figure 2, structure of <b>13</b>                                                                                | p 2 |
| Table 1, crystal data for <b>11</b> and <b>13</b>                                                               | p 3 |
| Gel-phase $^{19}\text{F}$ NMR spectra for substance <b>18</b> , <b>21</b> , <b>23</b> , <b>26</b> and <b>27</b> |     |
| Figure 3, <b>18</b>                                                                                             | p 4 |
| Figure 4, <b>21</b>                                                                                             | p 4 |
| Figure 5, <b>23</b>                                                                                             | p 5 |
| Figure 6, <b>26</b>                                                                                             | p 5 |
| Figure 7, <b>27</b>                                                                                             | p 6 |
| References                                                                                                      | p 6 |

### X-ray crystallography

X-ray crystal structures were determined from data collected with a Nonius KappaCCD area detector diffractometer, using graphite monochromatized MoK $\alpha$ .<sup>1</sup> Solution of the structures were made by direct methods<sup>2</sup> and refinements on F<sup>2</sup>.<sup>3</sup> All non-hydrogen atoms were refined with anisotropic displacement parameters. Hydrogen atoms were isotropically refined on calculated positions (riding model).

### Crystallization of **11** and **13**

From a different batch both **11** and the dimer **13** were purified by preparative LC/MS. Crystallisation from heptane, for **11**, or EtOH, for **13**, gave thin needles. X-ray diffraction on the crystals showed the expected structures.

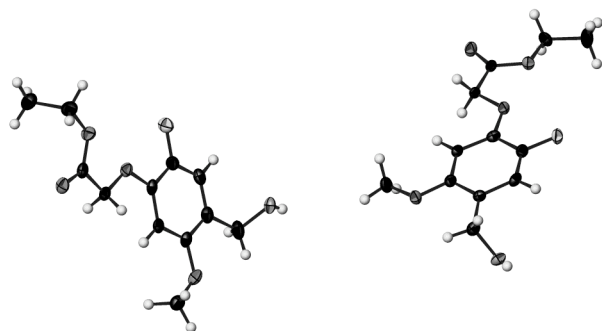

**Figure 1.** Single crystal X-ray structure of compound **11** (two crystallographical non-identical molecules), with displacement ellipsoids of non-hydrogen atoms drawn at the 50% probability level and hydrogen atoms of arbitrary size (ATOMS<sup>4</sup>).

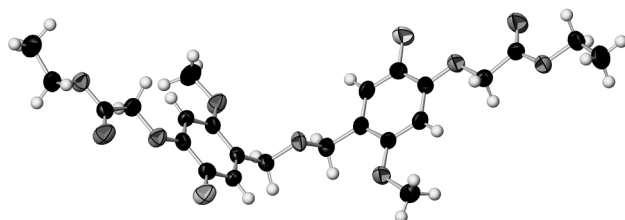

**Figure 2.** Single crystal X-ray structure of compound **13** with displacement ellipsoids of non-hydrogen atoms drawn at the 50% probability level and hydrogen atoms of arbitrary size (ATOMS<sup>4</sup>). The compound has imposed twofold symmetry with the central oxygen on the twofold axis.

**Table 1.** Crystal data for **11** and **13**.

| Identification code            | <b>11</b>                                                                                                               | <b>13</b>                                         |
|--------------------------------|-------------------------------------------------------------------------------------------------------------------------|---------------------------------------------------|
| Empirical formula              | C12 H15 F O5                                                                                                            | C24 H28 F2 O9                                     |
| Formula weight                 | 258.245                                                                                                                 | 498.477                                           |
| Temperature of data collection | 100K                                                                                                                    | 298K                                              |
| Wavelength                     | 0.71073 Å                                                                                                               | 0.71073 Å                                         |
| Crystal system                 | Triclinic                                                                                                               | Orthorhombic                                      |
| Space group                    | P-1                                                                                                                     | P b c n                                           |
| Unit cell dimensions           | a = 4.7854(6)<br>b = 11.316(2)<br>c = 22.705(3)<br>$\alpha$ = 80.348(8)<br>$\beta$ = 86.525(10)<br>$\gamma$ = 86.318(7) | a = 13.7696(5)<br>b = 8.3551(2)<br>c = 20.4951(6) |
| Volume                         | 1208.0(3)                                                                                                               | 2357.89(12)                                       |

Gel-phase  $^{19}\text{F}$  NMR spectra for substance 18, 21, 23, 26 and 27.

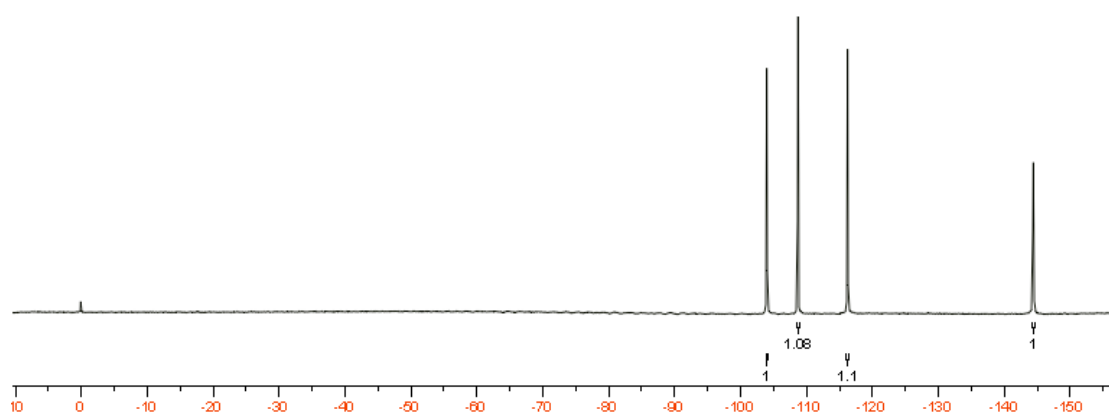

*Figure 3. Gel-phase  $^{19}\text{F}$  NMR spectrum for 18.*

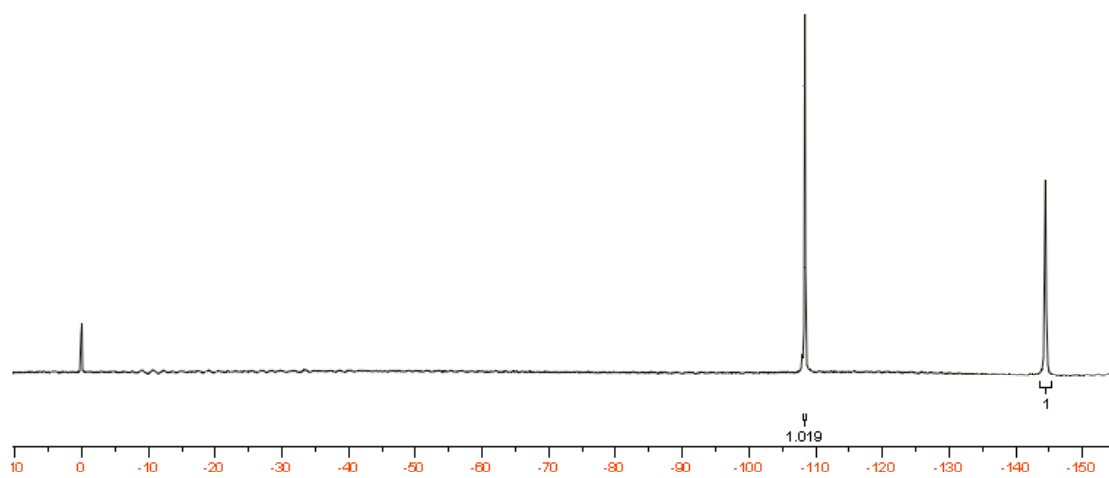

*Figure 4. Gel-phase  $^{19}\text{F}$  NMR spectrum for 21.*

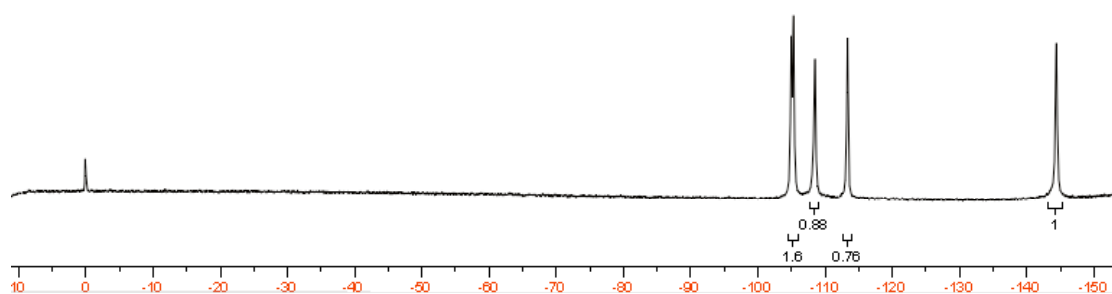

**Figure 5.** Gel-phase  $^{19}\text{F}$  NMR spectrum for 23.

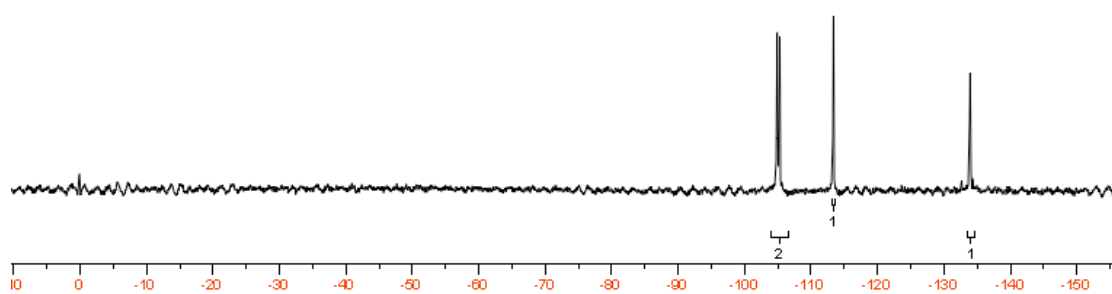

**Figure 6.** Gel-phase  $^{19}\text{F}$  NMR spectrum for 26.

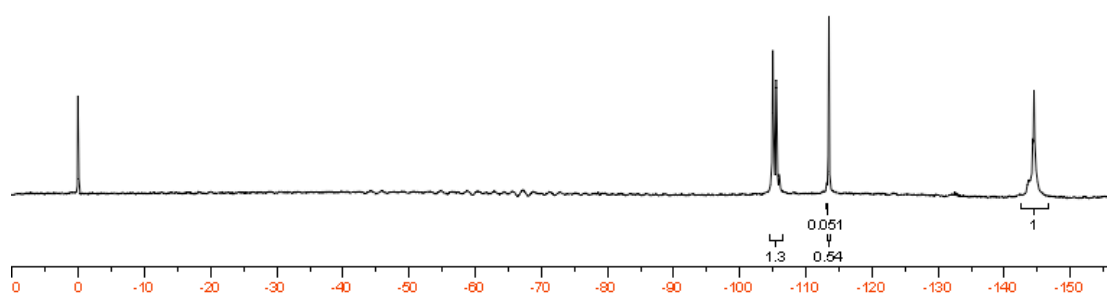

**Figure 7.** Gel-phase  $^{19}\text{F}$  NMR spectrum for **27**.

## References

1. Nonius., *COLLECT*, (1999) Nonius BV, Delft, The Netherlands.
2. A. Altomare, M. C. Burla, M. Camalli, G. L. Cascarano, C. Giacovazzo, A. Guagliardi, A. G. G. Moliterni, G. Polidori and R. Spagna, *J. Of Appl. Cryst.*, 1999, **32**, 115-119.
3. G. M. Sheldrick, *SHELXL97*, (1997) University of Göttingen, Göttingen, Germany.
4. E. Dowty, *ATOMS for Windows and Macintosh*, (2000) Shape Software, 521 Hidden Valley Road, Kingsport, TN 37663, USA.
